# Supplementary material
Source: PubMed Central journal article supplement (PMC6611169)
Supplement: NIHMS1023194-supplement-Tables_S2-8.pdf [file NIHMS1023194-supplement-Tables_S2-8.pdf]

## SUPPLEMENTAL TABLES

**Table S2. Characteristics of Patients Analyzed for Exosome RN7SL1 Shielding, Related to Figure 7F.**

| ID  | Sex    | Status  | Age | Cancer Type                          | Resection |
|-----|--------|---------|-----|--------------------------------------|-----------|
| H1  | Female | Healthy | 42  | None                                 | N/A       |
| H2  | Female | Healthy | 77  | None                                 | N/A       |
| H3  | Female | Healthy | 24  | None                                 | N/A       |
| H4  | Female | Healthy | 52  | None                                 | N/A       |
| H5  | Female | Healthy | 27  | None                                 | N/A       |
| H6  | Male   | Healthy | 27  | None                                 | N/A       |
| H7  | Male   | Healthy | 27  | None                                 | N/A       |
| H8  | Male   | Healthy | 44  | None                                 | N/A       |
| H9  | Male   | Healthy | 49  | None                                 | N/A       |
| H10 | Male   | Healthy | 57  | None                                 | N/A       |
| C1  | Female | Cancer  | 52  | Breast                               | Yes       |
| C2  | Female | Cancer  | 49  | Breast                               | Yes       |
| C3  | Female | Cancer  | 49  | Breast                               | Yes       |
| C4  | Female | Cancer  | 72  | Breast                               | Yes       |
| C5  | Female | Cancer  | 55  | Breast                               | Yes       |
| C6  | Female | Cancer  | 49  | Breast                               | Yes       |
| C7  | Male   | Cancer  | 82  | Pleomorphic undifferentiated sarcoma | No        |
| C8  | Female | Cancer  | 33  | Cervical squamous cell carcinoma     | No        |

**Table S3. Characteristics of Breast Cancer Patients Analyzed for Exosome RN7SL1 Shielding, Related to Figure 7G.**

| ID    | Sex    | Age | Subtype         | Stage | Resection |
|-------|--------|-----|-----------------|-------|-----------|
| TN1   | Female | 30  | Triple negative | 2A    | Post      |
| TN2   | Female | 54  | Triple negative | 2B    | Post      |
| TN3   | Female | 77  | Triple negative | 3C    | Post      |
| TN4   | Female | 68  | Triple negative | 3A    | Pre       |
| TN5   | Female | 30  | Triple negative | 2A    | Pre       |
| TN6   | Female | 52  | Triple negative | 2B    | Pre       |
| TN7   | Female | 45  | Triple negative | 2B    | Post      |
| TN8   | Female | 41  | Triple negative | 2A    | Pre       |
| TN9   | Female | 58  | Triple negative | 2A    | Pre       |
| TN10  | Female | 66  | Triple negative | 2B    | Pre       |
| ERPR1 | Female | 61  | ER/PR positive  | 2A    | Post      |
| ERPR2 | Female | 60  | ER/PR positive  | 2A    | Pre       |
| ERPR3 | Female | 47  | ER/PR positive  | 2B    | Post      |
| ERPR4 | Female | 74  | ER/PR positive  | 2A    | Post      |
| ERPR5 | Female | 85  | ER/PR positive  | 3B    | Post      |
| ERPR6 | Female | 39  | ER/PR positive  | 2A    | Pre       |
| ERPR7 | Female | 46  | ER/PR positive  | 2A    | Pre       |
| ERPR8 | Female | 57  | ER/PR positive  | 3C    | Pre       |

**Table S4. Breast Cancer and Stromal Fibroblast Cell Lines, Related to STAR Methods.**

| Human             |            |            | Mouse |            |
|-------------------|------------|------------|-------|------------|
| ISG-R             | ISG-NR     | Fibroblast | ISG-R | Fibroblast |
| MDA-MB-231 (1833) | MCF7       | MRC5       | KB1P  | ALF        |
| MDA-MB-231 (4175) | MDA-MB-468 | BJ         |       |            |
| MDA-MB-436        |            |            |       |            |
| HCC1937           |            |            |       |            |

**Table S5. Primers Used for qRT-PCR, Related to STAR Methods**

## Human

|          | Forward                | Reverse                 |
|----------|------------------------|-------------------------|
| GAPDH    | GCTCAGACACCATGGGGAAGG  | TTCCCGTTCTCAGCCTTGAC    |
| 18S      | GTTTCAGCCACCCGAGATTGA  | CCCATCACGAATGGGGTTCA    |
| ACTB     | GCCCTGAGGCACTCTTCCA    | CGGATGTCCACGTCACACTTC   |
| IFIT1    | GGCTGCCTAATTTACAGCAACC | GGCATTTCATCGTCATCAATGG  |
| MX1      | CGACACGAGTTCCACAAATG   | AAGCCTGGCAGCTCTCTACC    |
| ISG15    | GAGAGGCAGCGAACTCATCT   | CTTCAGCTCTGACACCGACA    |
| RIG-I    | CACCTCAGTTGCTGATGAAGGC | GTCAGAAGGAAGCACTTGCTACC |
| POLR3G   | GATGACGATGATGCCGCAGA   | GGTTGCCTCATCCATGTTGT    |
| POLR3F   | AGGCTCCACCAGTCACAGAC   | TGCCATTAACAGAAATCAACAAA |
| STAT1    | TACTCCAGGCCAAAGGAAG    | TTCAGCTGTGATGGCGATAG    |
| 7SK      | GGGTTGATTTCGGCTGATCT   | GGGGATGGTCGTCCTCTT      |
| RN7SL1   | GTGTCCGCACTAAGTTCGG    | TATTCACAGGCGCGATCC      |
| hsRN7SL1 | GCTACTCGGGAGGCTGAGGCT  | TATTCACAGGCGCGATCC      |
| RMRP     | AAAGTCCGCCAAGAAGCGTA   | CTGCCTGCGTAACTAGAGGG    |
| RPPH1    | AGCTTGGAACAGACTCACGG   | AATGGGCGGAGGAGAGTAGT    |
| RNU2     | CGTCCTCTATCCGAGGACAAT  | CGGAGCAAGCTCCTATTCCA    |
| TSG101   | AGAAGGGGCGTGATAGACCT   | CACTGAGACCGGCAGTCTTT    |
| MMP1     | TGTGGTGTCTCACAGCTTCC   | TTTTCAACTTGCCTCCCATC    |

## Mouse

|          | Forward                | Reverse                 |
|----------|------------------------|-------------------------|
| GAPDH    | AGGTCCGGTGTGAACGGATTTG | TGTAGACCATGTAGTTGAGGTCA |
| 18S      | CCCCATGAACGAGGGAATT    | GGGACTTAATCAACGCAAGCTT  |
| STAT1    | ACAACATGCTGGTGACAGAGCC | TGAAAAGTCCAACTCAACACCTC |
| ISG15    | CCAGTCTCTGACTGTGAGAGC  | GCATCACTGTGCTGCTGGGAC   |
| MX1      | GACCATAGGGGTCTTGACCAA  | AGACTTGCTCTTTCTGAAAAGCC |
| mmRN7SL1 | GCTACTCGGGAGGCTGAGACA  | TATTCACAGGCGCGATCC      |

## Spike-In Controls

|         | Forward              | Reverse                |
|---------|----------------------|------------------------|
| DVG396  | ACTGGGTCATTCCCTGACCA | CCCTCAGGTTCCCTGATCTCAC |
| ERCC04  | TGGGGCGAGTATTCCAATG  | TGGGGAAATTTGGGAAGCAGT  |
| ERCC95  | CTTGCTGCTGCATGTTGTG  | GAGCGATAGCGGTTAAGCCA   |
| ERCC108 | GCCGCTGTTGCGTAAATCAA | AGCCGACTGCTGCTCATATC   |
| ERCC130 | GTACTGACCAGCGTCACACA | GCGTGCGGTCAATCATCTTC   |

**Table S6. Adaptors for 5'-Triphosphate RNA Sequencing, Related to STAR Methods.**

|        |                                             |
|--------|---------------------------------------------|
| P5_RNA | ACACUCUUUCCCUACACGACGCUCUCCGAUCU            |
| P7_N9  | GTGACTGGAGTTCAGACGTGTGCTCTTCCGATCTNNNNNNNNN |

**Table S7. Gene Targeting Sequences for siRNA, shRNA and CRISPR gRNA, Related to STAR Methods.**

siRNA

|        | Sequence         | Catalog Number   |
|--------|------------------|------------------|
| CTRL   | Non-Targeting #1 | D-001810-01-20   |
| POLR3F | SMARTpool        | L-019240-01-0005 |
| SRP9   | SMARTpool        | L-019731-01-0005 |
| SRP14  | SMARTpool        | L-017767-01-0005 |
| MYC    | SMARTpool        | L-003282-02-0005 |

shRNA

|          | Sequence                 | Catalog Number |
|----------|--------------------------|----------------|
| CTRL     | GIPZ Non-Silencing shRNA | RHS4346        |
| RIG-I #1 | TTAAATTTGTCGCTAATCC      | V2LHS-199776   |
| RIG-I #2 | TAAAGTCCAGAATAACCTG      | V2LHS_197176   |

CRISPR

|          | gRNA Sequence        |
|----------|----------------------|
| RIG-I #1 | GGGTCTTCCGGATATAATCC |
| RIG-I #2 | GGATTATATCCGGAAGACCC |

**Table S8. Ribozyme Containing RNA Sequences for In Vitro Transcription, Related to STAR Methods.**

|               | Sequence                                                                                                                                                                                                                                                                                                                                                                                                                                                                                                                                                                                                                           |
|---------------|------------------------------------------------------------------------------------------------------------------------------------------------------------------------------------------------------------------------------------------------------------------------------------------------------------------------------------------------------------------------------------------------------------------------------------------------------------------------------------------------------------------------------------------------------------------------------------------------------------------------------------|
| RN7SL1 WT     | GTAAAACGACGGCCAGTAATACGACTCACTATAGGCCGGGCGCGGTG<br>GCGCGTGCCTGTAGTCCCAGCTACTCGGGAGGCTGAGGCTGGAGGA<br>TCGCTTGAGTCCAGGAGTTCTGGGCTGTAGTGCGCTATGCCGATCGG<br>GTGTCCGCACTAAGTTCGGCATCAATATGGTGACCTCCCGGGAGCGG<br>GGGACCACCAGGTTGCCTAAGGAGGGGTGAACCGGCCAGGTTCGGA<br>AACGGAGCAGGTCAAACCTCCCGTGCTGATCAGTAGTGGGATCGCGC<br>CTGTGAATAGCCACTGCACTCCAGCCTGGGCAACATAGCGAGACCC<br>GTCTCTGGCCGGCATGGTCCCAGCCTCCTCGCTGGCGCCGGCTGGG<br>CAACATTCCGAGGGGACCGTCCCCTCGGTAATGGCGAATGGGACGT<br>CGACTGCTAACAAAGCCCGAAAGGAAGCTGAGTTGGCTGCTGCCACC<br>GCTGAGCAATAACTAGCATAACCCCTTGGGGCCTCTAACGGGTCTT<br>GAGGGGTTTTTTGCTGAAAGGAGGAACTATATGTCATAGCTGTTTCCT<br>G   |
| RN7SL1 Scr    | GTAAAACGACGGCCAGTAATACGACTCACTATAGTTCACATGGGCGA<br>CCTACCGCGACAGTAGGTGGTTTTCGCTGTGGAGCTTCGCGGGAACAT<br>TCTCACTCCGCAGTGTCCCGTTAAACGGCGGGGCTGGTGCCCGGAC<br>AGGGGCGGGGTGTCTACCACTGGTCCAGCTCACTTTGGCGAGACGA<br>CCGCAGTCCGAATAAATGCATGAGGCGGGCCGCACAAGCTGAAGAG<br>AACTCCGATGGGCGGGGTATCCACCCGGCCCGTGGGGGATATGATG<br>CCAGCTCGGTCCAACGAGCGGTTAGGGCGACCCTTGCGGCGATATG<br>TCGAGTCCGGGCCGGCATGGTCCCAGCCTCCTCGCTGGCGCCGGCT<br>GGGCAACATTCCGAGGGGACCGTCCCCTCGGTAATGGCGAATGGGA<br>CGTCGACTGCTAACAAAGCCCGAAAGGAAGCTGAGTTGGCTGCTGCC<br>ACCGCTGAGCAATAACTAGCATAACCCCTTGGGGCCTCTAACGGGT<br>CTTGAGGGGTTTTTTGCTGAAAGGAGGAACTATATGTCATAGCTGTTT<br>CCTG |
| RN7SL1 5'Mut  | GTAAAACGACGGCCAGTAATACGACTCACTATAGGCCGCCGGGCGGTG<br>GCGCGTGCCTGTAGTGGGAGCTACTCGGGACCGTCTCGGTCCAGGA<br>AGCGATGAGTCGTCCAGTTGACCGCTGTTACGCGATAGCCGATCGG<br>GTGTCCGCACTAAGTTCGGCATCAATATGGTGACCTCCCGGGAGCGG<br>GGGACCACCAGGTTGCCTAAGGAGGGGTGAACCGGCCAGGTTCGGA<br>AACGGAGCAGGTCAAACCTCCCGTGCTGATCAGTAGTGGGATCGCGC<br>CTGTGAATAGCCACTGCACTCCAGCCTGGGCAACATAGCGAGACCC<br>GTCTCTGGCCGGCATGGTCCCAGCCTCCTCGCTGGCGCCGGCTGGG<br>CAACATTCCGAGGGGACCGTCCCCTCGGTAATGGCGAATGGGACGT<br>CGACTGCTAACAAAGCCCGAAAGGAAGCTGAGTTGGCTGCTGCCACC<br>GCTGAGCAATAACTAGCATAACCCCTTGGGGCCTCTAACGGGTCTT<br>GAGGGGTTTTTTGCTGAAAGGAGGAACTATATGTCATAGCTGTTTCCT<br>G   |
| RN7SL1 MidMut | GTAAAACGACGGCCAGTAATACGACTCACTATAGGCCGGGCGCGGTG<br>GCGCGTGCCTGTAGTCCCAGCTACTCGGGAGGCTGAGGCTGGAGGA<br>TCGCTTGAGTCCAGGAGTTCTGGGCTGTAGTGCGCTATGCCGATCGG<br>GTGTCCGCACTAAGTTCGGCATggtataccactggtgggGGGAGCGGGGAC<br>CACCAGGTTGCCTAAGGAGGGGTGAACCGGCCAGGTTCGGAACCGG<br>AGCAGGTCAAACCTCCCGTGCTGATCAGTAGTGGGATCGCGCCTGTG<br>AATAGCCACTGCACTCCAGCCTGGGCAACATAGCGAGACCCCGTCTC<br>TGGCCGGCATGGTCCCAGCCTCCTCGCTGGCGCCGGCTGGGCAACA                                                                                                                                                                                                              |

|          |                                                                                                                                                                                                                                                                                                                                                                                                                                                                                                                                                                                                                                 |
|----------|---------------------------------------------------------------------------------------------------------------------------------------------------------------------------------------------------------------------------------------------------------------------------------------------------------------------------------------------------------------------------------------------------------------------------------------------------------------------------------------------------------------------------------------------------------------------------------------------------------------------------------|
|          | TTCCGAGGGGACCGTCCCCTCGGTAATGGCGAATGGGACGTCGACT<br>GCTAACAAAGCCCGAAAGGAAGCTGAGTTGGCTGCTGCCACCGCTGA<br>GCAATAACTAGCATAACCCCTTGGGGCCTCTAAACGGGTCTTGAGGG<br>GTTTTTTGCTGAAAGGAGGAACTATATGTCATAGCTGTTTCCTG                                                                                                                                                                                                                                                                                                                                                                                                                            |
| GAPDH300 | GTAAAACGACGGCCAGTAATACGACTCACTATAGATGGGGAAGGTGA<br>AGGTTCGGAGTCAACGGATTTGGTCGTATTGGGCGCCTGGTCACCAGG<br>GCTGCTTTTAACTCTGGTAAAGTGGATATTGTTGCCATCAATGACCCC<br>TTCATTGACCTCAACTACATGGTTTACATGTTCCAATATGATTCCACCC<br>ATGGCAAATTCCATGGCACCGTCAAGGCTGAGAACGGGAAGCTTGTC<br>ATCAATGGAAATCCCATCACCATCTTCCAGGAGCGAGATCCCTCCAAA<br>ATCAAGTGGGGCGATGCTGGCGCTGAGTACGTCGTGGAGTCCACTG<br>GGGCCGGCATGGTCCCAGCCTCCTCGCTGGCGCCGGCTGGGCAACA<br>TTCCGAGGGGACCGTCCCCTCGGTAATGGCGAATGGGACGTCGACT<br>GCTAACAAAGCCCGAAAGGAAGCTGAGTTGGCTGCTGCCACCGCTGA<br>GCAATAACTAGCATAACCCCTTGGGGCCTCTAAACGGGTCTTGAGGG<br>GTTTTTTGCTGAAAGGAGGAACTATATGTCATAGCTGTTTCCTG |
